# Supplementary material for: Engagement, Innovation, and Impact in a Dietitian Contact Centre: The EatRight Ontario Experience
Source: Atypon-hosted journal article supplement (doi:10.3148/cjdpr-2020-002), 2020-02-19
Supplement: cjdpr-2020-002supplb.pdf [file cjdpr-2020-002supplb.pdf]

## EatRight Ontario Health Intermediaries Survey 2017

**Dear Colleague**

**EatRight Ontario (ERO) is a program of Dietitians of Canada with annual funding from the Ontario Ministry of Health and Long-Term Care. The EatRight Ontario contact centre provides easy access to nutrition advice from Registered Dietitians to improve health for all Ontarians. Increased access to credible nutrition advice enables Ontarians to develop the personal skills required to support healthy eating, healthy weights, and the prevention of chronic disease.**

**Dietitians of Canada and EatRight Ontario have contracted an independent evaluation team (Jeanne Legare and Associates) to conduct an impact evaluation of the ERO service. Practitioners, program administrators and policymakers support critical aspects of Ontario's health system, and your views on the impact of ERO are an important part of the evaluation focus. Please take a few minutes to complete this survey, regardless of whether or not you have used the ERO service. Your participation is appreciated but voluntary. Your responses will be kept confidential and no identifying information will be released.**

**The survey will take approximately 10 minutes to complete. We appreciate your response by [insert date].**

## EatRight Ontario Health Intermediaries Survey 2017

1. Where do you or your organization usually provide service?

- Ontario
- Other Canadian provinces or territories
- Outside of Canada

## EatRight Ontario Health Intermediaries Survey 2017

This study is focused on nutrition service delivery in Canada. Your response indicates that you provide service outside of Canada only. If this is incorrect, click "Previous" and change your answer. Otherwise, click on "Next" to end the survey.

## EatRight Ontario Health Intermediaries Survey 2017

2. In which Ontario region(s) does your organization provide service? (check all that apply)

- All Ontario regions
- South West
- Central West
- Toronto/Central East
- Eastern
- North

EatRight Ontario Health Intermediaries Survey 2017

3. In which other provinces or territories does your organization provide service? (check all that apply)

- All provinces and territories
- British Columbia
- Alberta
- Saskatchewan
- Manitoba
- Quebec
- New Brunswick
- Nova Scotia
- Prince Edward Island
- Newfoundland and Labrador
- Yukon
- Northwest Territories
- Nunavut

EatRight Ontario Health Intermediaries Survey 2017

4. Which statement BEST describes your role? (check one only)

- I am a dietitian/nutrition professional
- I am a physician
- I am a health service provider, but not a physician or dietitian
- I am a non-medical professional (e.g., fitness or social service professional, teacher)
- I am a program administrator or public policy maker
- Other (please specify)

5. Which sector BEST describes your work? (check one only)

- Public health
- Primary care
- Acute care
- Employee wellness
- Education
- Private sector (e.g., grocery/pharmacy retail, private consulting)
- Other (please specify)

EatRight Ontario Health Intermediaries Survey 2017

6. Have you used EatRight Ontario or recommended it to colleagues or clients? (check all that apply)

- I have used EatRight Ontario for professional reasons.
- I have recommended EatRight Ontario to a colleague.
- I have recommended EatRight Ontario to a client.
- I have used EatRight Ontario for personal reasons.
- I have not used or recommended EatRight Ontario.

EatRight Ontario Health Intermediaries Survey 2017

7. Is there a reason you have not used or recommended EatRight Ontario?

EatRight Ontario Health Intermediaries Survey 2017

8. What features or services of EatRight Ontario have you used or recommended for professional reasons?  
(check all that apply)

- The EatRight Ontario telephone service
- The EatRight Ontario web-based "Email a Dietitian" service.
- The EatRight Ontario eNewsletter
- The EatRight Ontario nutrition information website ([www.eatrightontario.ca](http://www.eatrightontario.ca))
- EatRight Ontario web-based tools (e.g., My Meal Planner and Food Portions Toolkit)
- I have ordered promotional items (e.g., recipe booklets, portion toolkit)
- Social media (Facebook, etc.)
- Don't know/Not applicable

EatRight Ontario Health Intermediaries Survey 2017

9. Please rate the value of each EatRight Ontario mode of service for your organization.

|                                                                                                                           | Excellent             | Good                  | Fair                  | Poor                  | Don't know or N/A     |
|---------------------------------------------------------------------------------------------------------------------------|-----------------------|-----------------------|-----------------------|-----------------------|-----------------------|
| The EatRight Ontario telephone service                                                                                    | <input type="radio"/> |
| The EatRight Ontario web-based "Email a Dietitian" service                                                                | <input type="radio"/> |
| The EatRight Ontario nutrition information website ( <a href="http://www.eatrightontario.ca">www.eatrightontario.ca</a> ) | <input type="radio"/> |
| The EatRight Ontario eNewsletter                                                                                          | <input type="radio"/> |
| EatRight Ontario web-based tools (e.g., My Meal Planner and Portion Toolkit)                                              | <input type="radio"/> |
| The Nutri-eSTEP or Nutri-eSCREEN screening tool and support resources                                                     | <input type="radio"/> |

EatRight Ontario Health Intermediaries Survey 2017

10. Please rate your level of agreement with each of the following statements regarding EatRight Ontario.

|                                                                                                                                                             | Strongly agree        | Agree                 | Neither agree nor disagree | Disagree              | Strongly disagree     | Don't know or N/A     |
|-------------------------------------------------------------------------------------------------------------------------------------------------------------|-----------------------|-----------------------|----------------------------|-----------------------|-----------------------|-----------------------|
| EatRight Ontario provides trustworthy nutrition information.                                                                                                | <input type="radio"/> | <input type="radio"/> | <input type="radio"/>      | <input type="radio"/> | <input type="radio"/> | <input type="radio"/> |
| EatRight Ontario complements or supports my work and/or my organization's work in supporting healthy eating.                                                | <input type="radio"/> | <input type="radio"/> | <input type="radio"/>      | <input type="radio"/> | <input type="radio"/> | <input type="radio"/> |
| EatRight Ontario provides a service that I or my organization would not normally be able to provide (e.g., due to time, lack of funding, scope of services) | <input type="radio"/> | <input type="radio"/> | <input type="radio"/>      | <input type="radio"/> | <input type="radio"/> | <input type="radio"/> |
| EatRight Ontario competes with my services or those of my organization                                                                                      | <input type="radio"/> | <input type="radio"/> | <input type="radio"/>      | <input type="radio"/> | <input type="radio"/> | <input type="radio"/> |

EatRight Ontario Health Intermediaries Survey 2017

11. Please explain how EatRight Ontario competes with your services or those of your organization.

EatRight Ontario Health Intermediaries Survey 2017

12. What impact do you think EatRight Ontario has had on the following?

|                                                                                                  | A major impact        | A minor impact        | Little or no impact   | Don't know            | Not applicable        |
|--------------------------------------------------------------------------------------------------|-----------------------|-----------------------|-----------------------|-----------------------|-----------------------|
| Providing Ontarians with increased access to credible, evidence-based nutrition advice           | <input type="radio"/> |
| Providing public access to RDs                                                                   | <input type="radio"/> |
| Providing access to evidence-based healthy eating resource and behaviour change supports         | <input type="radio"/> |
| Supporting me/my sector in delivering nutrition-related services for our clients                 | <input type="radio"/> |
| Supporting Ontario's screening program for preschoolers with Nutri-eSTEP                         | <input type="radio"/> |
| Supporting Ontario's school food and beverage policy (PPM 150) implementation                    | <input type="radio"/> |
| Supporting Ontarians from diverse cultures with relevant information in their preferred language | <input type="radio"/> |

EatRight Ontario Health Intermediaries Survey 2017

13. What impacts, positive or negative, has EatRight Ontario had on your organization, professional practice, or your clients?

EatRight Ontario Health Intermediaries Survey 2017

14. If the EatRight Ontario program was not offered, what aspect(s) of service would be missed most in your sector?

EatRight Ontario Health Intermediaries Survey 2017

15. Where would you go, or what you use to fill that gap?

EatRight Ontario Health Intermediaries Survey 2017

16. Are there any other services that you would like to see offered from a Registered Dietitian call centre?

17. Do you have any final comments?

Thank you for your time and feedback. Information from this survey will be used to inform planning of future services.
